# Supplementary material for: Genetic diversity and population differentiation in Earliella scabrosa, a pantropical species of Polyporales
Source: Springer Nature journal article supplement (doi:10.1038/s41598-023-50398-5), 2023-12-27
Supplement: MOESM1 [file 41598_2023_50398_MOESM1_ESM.pdf]

**Supplementary S1.** ML tree was constructed from the ITS sequences showing the phylogenetic relationships between the 95 *Earliella scabrosa* collections. Sequences outside the true *Earliella scabrosa* are highlighted in red and are not taken into account in the rest of the analyses.

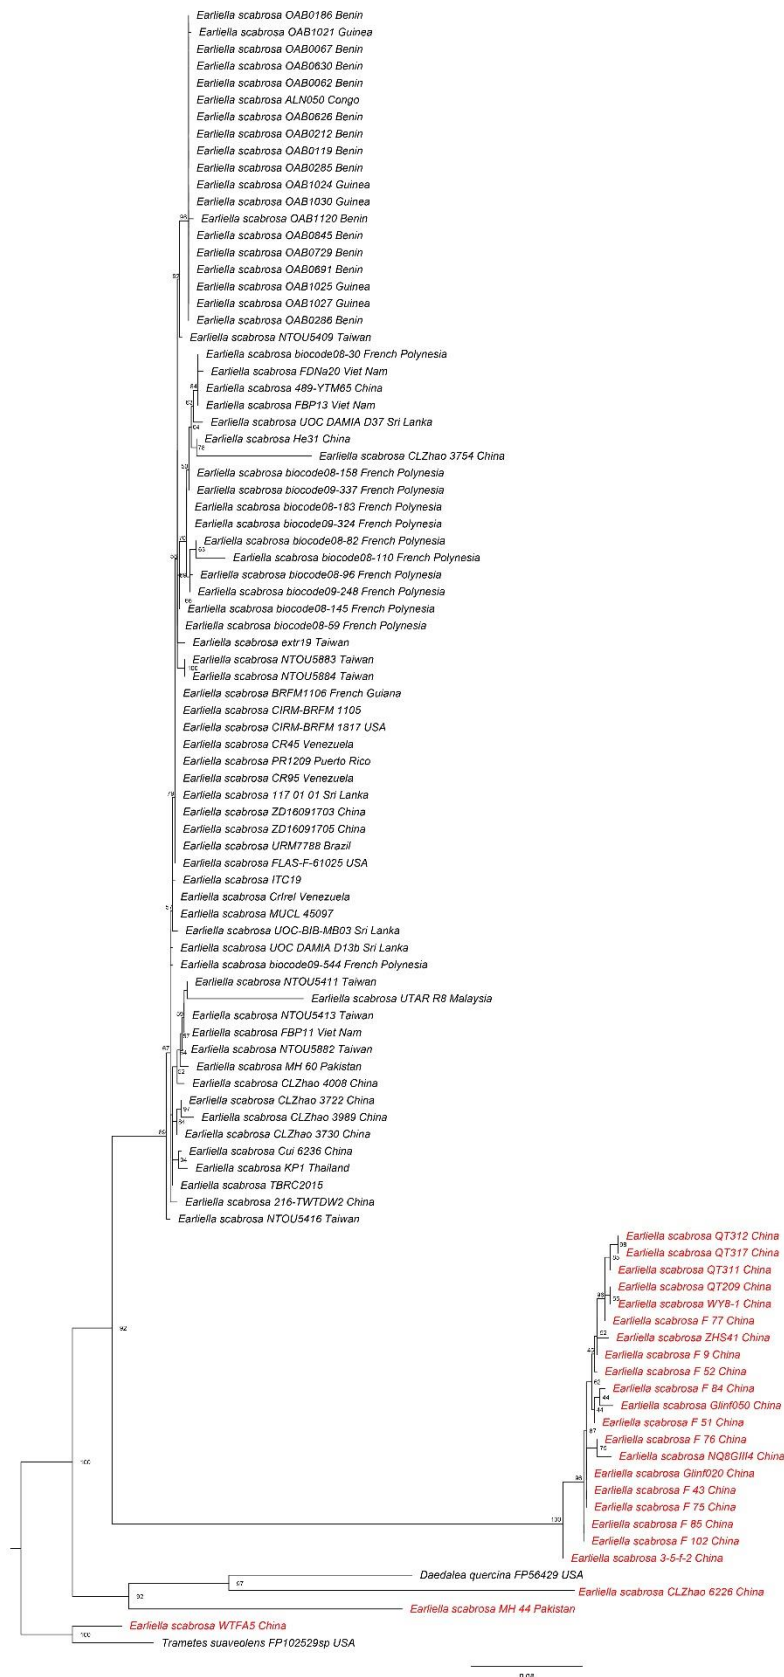

**Supplementary S2.** Data on the *Earliella scabrosa* collections used in this study

| Species name              | Vouchers | Forest type                 | Country |
|---------------------------|----------|-----------------------------|---------|
| <i>Earliella scabrosa</i> | OAB0062  | Semi decidious Dense forest | Benin   |
| <i>Earliella scabrosa</i> | OAB0067  | Semi decidious Dense forest | Benin   |
| <i>Earliella scabrosa</i> | OAB0119  | Woodland                    | Benin   |
| <i>Earliella scabrosa</i> | OAB0186  | Woodland                    | Benin   |
| <i>Earliella scabrosa</i> | OAB0212  | Savanna                     | Benin   |
| <i>Earliella scabrosa</i> | OAB0285  | Semi decidious Dense forest | Benin   |
| <i>Earliella scabrosa</i> | OAB0286  | Semi decidious Dense forest | Benin   |
| <i>Earliella scabrosa</i> | OAB0691  | Dense dry forest            | Benin   |
| <i>Earliella scabrosa</i> | OAB0626  | Dense dry forest            | Benin   |
| <i>Earliella scabrosa</i> | OAB0630  | Dense dry forest            | Benin   |
| <i>Earliella scabrosa</i> | OAB0729  | Semi decidious Dense forest | Benin   |
| <i>Earliella scabrosa</i> | OAB0755  | Woodland                    | Benin   |
| <i>Earliella scabrosa</i> | OAB0845  | Woodland                    | Benin   |
| <i>Earliella scabrosa</i> | OAB1120  | Dense dry forest            | Benin   |
| <i>Earliella scabrosa</i> | OAB1021  | Woodland Serekoro           | Guinea  |
| <i>Earliella scabrosa</i> | OAB1024  | Woodland Serekoro           | Guinea  |
| <i>Earliella scabrosa</i> | OAB1025  | Woodland Serekoro           | Guinea  |
| <i>Earliella scabrosa</i> | OAB1027  | Woodland Kankan             | Guinea  |
| <i>Earliella scabrosa</i> | OAB1030  | Woodland Kankan             | Guinea  |
| <i>Earliella scabrosa</i> | ALN050   | Mbindjo forest              | Congo   |

**Supplementary S3.** Result from species delimitation analysis using the Automated Barcode Gap Discovery (ABGD)

|                                                                                                                                                                                                                                                                                                                                                                                                                                                                                                                                                                                                                                                                                                                                                                                                             |
|-------------------------------------------------------------------------------------------------------------------------------------------------------------------------------------------------------------------------------------------------------------------------------------------------------------------------------------------------------------------------------------------------------------------------------------------------------------------------------------------------------------------------------------------------------------------------------------------------------------------------------------------------------------------------------------------------------------------------------------------------------------------------------------------------------------|
| Group [ 1 ] n: 10 ;id: Earliella scabrosa 117 01 01 Sri Lanka; Earliella scabrosa CIRM-BRFM 1817 USA; Earliella scabrosa CR45 Venezuela; Earliella scabrosa CR95 Venezuela; Earliella scabrosa PR1209 Puerto Rico; Earliella scabrosa FLAS-F-61025 USA; Earliella scabrosa URM7788 Brazil; Earliella scabrosa ZD16091703 China; Earliella scabrosa ZD16091705 China; Earliella scabrosa BRFM1106 French Guiana                                                                                                                                                                                                                                                                                                                                                                                              |
| Group [ 2 ] n: 2 ;id: Earliella scabrosa CrIrel Venezuela; Earliella scabrosa UOC DAMIA D37 Sri Lanka                                                                                                                                                                                                                                                                                                                                                                                                                                                                                                                                                                                                                                                                                                       |
| Group[ 3 ] n: 17 ;id: Earliella scabrosa biocode08-59 French Polynesia; Earliella scabrosa biocode08-30 French Polynesia; Earliella scabrosa FBP13 Viet Nam; Earliella scabrosa biocode08-82 French Polynesia; Earliella scabrosa biocode08-183 French Polynesia; Earliella scabrosa biocode09-337 French Polynesia; Earliella scabrosa biocode08-158 French Polynesia; Earliella scabrosa biocode08-145 French Polynesia; Earliella scabrosa biocode09-248 French Polynesia; Earliella scabrosa biocode09-324 French Polynesia ; Earliella scabrosa CLZhao 3730 China; Earliella scabrosa NTOU5411 Taiwan; Earliella scabrosa MH 60 Pakistan; Earliella scabrosa FBP11 Viet Nam; Earliella scabrosa NTOU5413 Taiwan; Earliella scabrosa NTOU5882 Taiwan; Earliella scabrosa biocode08-110 French Polynesia |
| Group [ 4 ] n: 1 ;id: Earliella scabrosa UOC DAMIA D13b Sri Lanka                                                                                                                                                                                                                                                                                                                                                                                                                                                                                                                                                                                                                                                                                                                                           |
| Group [ 5 ] n: 1 ;id: Earliella scabrosa extr19 Taiwan                                                                                                                                                                                                                                                                                                                                                                                                                                                                                                                                                                                                                                                                                                                                                      |
| Group [ 6 ] n: 1 ;id: Earliella scabrosa biocode09-544 French Polynesia                                                                                                                                                                                                                                                                                                                                                                                                                                                                                                                                                                                                                                                                                                                                     |
| Group [ 7 ] n: 1 ;id: Earliella scabrosa biocode08-96 French Polynesia                                                                                                                                                                                                                                                                                                                                                                                                                                                                                                                                                                                                                                                                                                                                      |
| Group [ 8 ] n: 1 ;id: Earliella scabrosa He31 China                                                                                                                                                                                                                                                                                                                                                                                                                                                                                                                                                                                                                                                                                                                                                         |
| Group [ 9 ] n: 3 ;id: Earliella scabrosa CLZhao 3722 China; Earliella scabrosa CLZhao 3989 China; Earliella scabrosa CLZhao 4008 China                                                                                                                                                                                                                                                                                                                                                                                                                                                                                                                                                                                                                                                                      |
| Group [ 10 ] n: 1 ;id: Earliella scabrosa Cui 6236 China                                                                                                                                                                                                                                                                                                                                                                                                                                                                                                                                                                                                                                                                                                                                                    |
| Group [ 11 ] n: 1 ;id: Earliella scabrosa KP1 Thailand                                                                                                                                                                                                                                                                                                                                                                                                                                                                                                                                                                                                                                                                                                                                                      |
| Group [ 12 ] n: 1 ;id: Earliella scabrosa UOC-BIB-MB03 Sri Lanka                                                                                                                                                                                                                                                                                                                                                                                                                                                                                                                                                                                                                                                                                                                                            |
| Group [ 13 ] n: 1 ;id: Earliella scabrosa FDNa20 Viet Nam                                                                                                                                                                                                                                                                                                                                                                                                                                                                                                                                                                                                                                                                                                                                                   |
| Group [ 14 ] n: 1 ;id: Earliella scabrosa 216-TWTDW2 China                                                                                                                                                                                                                                                                                                                                                                                                                                                                                                                                                                                                                                                                                                                                                  |
| Group [ 15 ] n: 1 ;id: Earliella scabrosa NTOU5416 Taiwan                                                                                                                                                                                                                                                                                                                                                                                                                                                                                                                                                                                                                                                                                                                                                   |
| Group [ 16 ] n: 1 ;id: Earliella scabrosa NTOU5409 Taiwan                                                                                                                                                                                                                                                                                                                                                                                                                                                                                                                                                                                                                                                                                                                                                   |
| Group [ 17 ] n: 20 ;id: Earliella scabrosa OAB0691 Benin; Earliella scabrosa OAB0119 Benin; Earliella scabrosa OAB0212 Benin; Earliella scabrosa OAB0286 Benin; Earliella scabrosa ALN050 Congo; Earliella scabrosa OAB0067 Benin; Earliella scabrosa OAB0186 Benin; Earliella scabrosa OAB0285 Benin; Earliella scabrosa OAB0626 Benin; Earliella scabrosa OAB1027 Guinea; Earliella scabrosa OAB1021 Guinea; Earliella scabrosa OAB1024 Guinea; Earliella scabrosa OAB1025 Guinea; Earliella scabrosa OAB1030 Guinea; Earliella scabrosa OAB0062 Benin; Earliella scabrosa OAB0755 Benin; Earliella scabrosa OAB0630 Benin; Earliella scabrosa OAB1120 Benin; Earliella scabrosa OAB0729 Benin; Earliella scabrosa OAB0845 Benin                                                                          |
| Group [ 18 ] n: 2 ;id: Earliella scabrosa NTOU5883 Taiwan; Earliella scabrosa NTOU5884 Taiwan                                                                                                                                                                                                                                                                                                                                                                                                                                                                                                                                                                                                                                                                                                               |

**Supplementary S4.** Result from species delimitation analysis using the Automated Barcode Gap Discovery (ABGD)

Group[ 1 ] n: 66 ;id: Earliella scabrosa 117 01 01 Sri Lanka; Earliella scabrosa CIRM-BRFM 1817 USA; Earliella scabrosa CR45 Venezuela; Earliella scabrosa CR95 Venezuela; Earliella scabrosa PR1209 Puerto Rico; Earliella scabrosa FLAS-F-61025 USA; Earliella scabrosa CrIrel Venezuela; Earliella scabrosa URM7788 Brazil; Earliella scabrosa ZD16091703 China; Earliella scabrosa ZD16091705 China; Earliella scabrosa biocode08-59 French Polynesia; Earliella scabrosa biocode08-30 French Polynesia; Earliella scabrosa FBP13 Viet Nam; Earliella scabrosa UOC DAMIA D13b Sri Lanka; Earliella scabrosa BRFM1106 French Guiana; Earliella scabrosa UOC DAMIA D37 Sri Lanka; Earliella scabrosa biocode08-82 French Polynesia; Earliella scabrosa biocode08-183 French Polynesia; Earliella scabrosa biocode09-337 French Polynesia; Earliella scabrosa biocode08-158 French Polynesia; Earliella scabrosa biocode08-145 French Polynesia; Earliella scabrosa extr19 Taiwan; Earliella scabrosa biocode09-544 French Polynesia; Earliella scabrosa biocode08-96 French Polynesia; Earliella scabrosa biocode09-248 French Polynesia; Earliella scabrosa biocode09-324 French Polynesia; Earliella scabrosa He31 China; Earliella scabrosa CLZhao 3722 China; Earliella scabrosa CLZhao 3730 China; Earliella scabrosa NTOU5411 Taiwan; Earliella scabrosa CLZhao 3989 China; Earliella scabrosa Cui 6236 China; Earliella scabrosa MH 60 Pakistan; Earliella scabrosa KP1 Thailand; Earliella scabrosa FBP11 Viet Nam; Earliella scabrosa UOC-BIB-MB03 Sri Lanka; Earliella scabrosa FDNa20 Viet Nam; Earliella scabrosa 216-TWTDW2 China; Earliella scabrosa NTOU5416 Taiwan; Earliella scabrosa NTOU5409 Taiwan; Earliella scabrosa NTOU5413 Taiwan; Earliella scabrosa CLZhao 4008 China; Earliella scabrosa OAB0691 Benin Earliella scabrosa OAB0119 Benin; Earliella scabrosa OAB0212 Benin; Earliella scabrosa OAB0286 Benin; Earliella scabrosa ALN050 Congo; Earliella scabrosa OAB0067 Benin; Earliella scabrosa OAB0186 Benin; Earliella scabrosa OAB0285 Benin; Earliella scabrosa OAB0626 Benin; Earliella scabrosa OAB1027 Guinea; Earliella scabrosa OAB1021 Guinea; Earliella scabrosa OAB1024 Guinea; Earliella scabrosa OAB1025 Guinea; Earliella scabrosa OAB1030 Guinea; Earliella scabrosa OAB0062 Benin; Earliella scabrosa OAB0755 Benin; Earliella scabrosa OAB0630 Benin; Earliella scabrosa OAB1120 Benin; Earliella scabrosa OAB0729 Benin; Earliella scabrosa OAB0845 Benin; Earliella scabrosa NTOU5882 Taiwan; Earliella scabrosa NTOU5883 Taiwan; Earliella scabrosa NTOU5884 Taiwan; Earliella scabrosa biocode08-110 French Polynesia
